# Supplementary material
Source: PubMed Central journal article supplement (PMC2868107)
Supplement: NIHMS196950-supplement-1_si_001.pdf [file NIHMS196950-supplement-1_si_001.pdf]

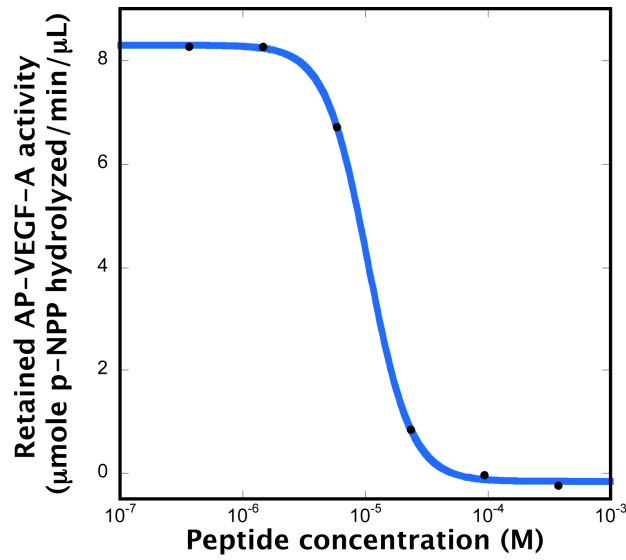

Supplemental Figure 1: Validation of the novel neuropilin plate based assay. The well characterized neuropilin inhibitory peptide, ATWLPPR, inhibits VEGF-A binding to neuropilin with the expected inhibitory potency. The  $IC_{50}$  was fit using a four parameter sigmoidal curve with an  $R^2=0.9998$
